# Supplementary material for: Improving AlphaFold predicted contacts inalpha-helical transmembrane proteins structuresusing structural features
Source: Research Square preprint supplement (doi:10.21203/rs.3.rs-3475769/v1), 2023-10-26
Supplement: Supplementary file 1 [file 36ba6ea7f6dc0409e6cec18e.pdf]

## 1. Dataset - Experimentally determined structures

The following sequences were removed from the datasets:-

- TRAIN dataset - Sequences '5yi2B', '5lkiA', '5bw8D' in the TRAIN dataset have no positive inter-helical contacts, which would have led to Recall score being undefined, consequently we removed them from the dataset.
- TEST dataset - For sequences '4p79A', '4qtnA', '4f35B' in the TEST dataset, some of the residue positions annotated to be in TM zone don't match with the positions that Sun et. al (Sun and Frishman, 2020) predicted on hence they were removed.
- PREVIOUS dataset - For sequences '2rh1A', '3ukmA', '3m73A', '3m71A' in the PREVIOUS dataset, some of the residue positions annotated to be in TM zone don't match with the positions that Sun et. al (Sun and Frishman, 2020) predicted on hence they were removed.

With a final total of 162 sequences in the TRAIN dataset, 40 sequences in the PREVIOUS dataset and 54 sequences in the TEST dataset.

## 2. Dataset - Alphafold predicted structures

AlphaFold DB provides predicted structures for over 200 million protein sequences in the UniProt (UniProt Consortium, 2023) reference proteome (AlphaFold DB, 2022; Varadi et al., 2022). These structures can be accessed via the protein chain's UniProtKB ID (UniProt Consortium, 2023), and the 3-d coordinates for each residue's heavy atoms are available in PDB atomic coordinate format. We relied on Research Collaboratory for Structural Bioinformatics protein data bank (RCSB PDB <sup>1</sup>) (Burley et al., 2023; Berman et al., 2002) to map the PDB ID of every chain in the DeepHelicon dataset to UniProtKB ID. If a match was found, the corresponding predicted structure was accessed via AlphaFold DB. For several protein chains, an integer offset to PDB positions in the DeepHelicon dataset is needed to sequentially align them with Alphafold structures, as is also reported in Faezov et. al (Faezov and Dunbrack Jr, 2021). In case a UniProtKB ID match was not found in RCSB PDB or the sequences from UniProt and DeepHelicon dataset matched partially i.e. all positions annotated to be in TM zones were not contiguously included, then the chain was removed from the dataset. This process leads to a final total of 154 sequences in the TRAIN dataset, 34 sequences in the PREVIOUS dataset and 49 sequences in the TEST dataset. In the subsequent subsections we explain in some detail the changes that were made to each dataset i.e. the cases when a sequence was removed or an integer offset was added.

### 2.1. TRAIN dataset

The changes for the TRAIN dataset are summarized in Table 1.

1. **1aigL** - Uniprot reports sequence match with PDB sequence for positions 2-282 (PDB sequence indices). Subtracting 1 from AlphaFold2 sequence positions will sequentially align the structures.
2. **2bhwA** - Uniprot reports sequence match with PDB sequence for positions 38-269 (PDB sequence indices), remaining positions are outside the TM zone. Subtracting 37 from AlphaFold2 sequence positions will sequentially align the structures.
3. **2c3eA** - Uniprot reports sequence match with PDB sequence for positions 2-298 (PDB sequence indices). Subtracting 1 from AlphaFold2 sequence positions will sequentially align the structures.
4. **2priA** - Uniprot reports sequence match with PDB sequence for positions 2-843 (PDB sequence indices). Subtracting 1 from AlphaFold2 sequence positions will sequentially align the structures.
5. **3abvC** - Uniprot reports sequence match with PDB sequence for positions 30-169 (PDB sequence indices). Subtracting 26 from AlphaFold2 sequence positions will sequentially align the structures.
6. **3abvD** - Uniprot reports sequence match with PDB sequence for positions 57-159 (PDB sequence indices), remaining positions are outside the TM zone. Subtracting 23 from AlphaFold2 sequence positions will sequentially align the structures.
7. **3a3yA** - Uniprot reports a sequence match with PDB sequence for positions 1-1028 (entire sequence). PDB IDs in DeepHelicon dataset start at -4. Subtracting 5 from AlphaFold2 sequence positions will sequentially align the structures.
8. **3dh4A** - Uniprot reports sequence match with PDB sequence for positions 47-543 (PDB sequence indices), this matches DeepHelicon dataset. However, PDB IDs 8-19 in the DeepHelicon dataset are annotated as TM domain. Hence, removing this sequence.
9. **3m71A** - Uniprot reports sequence match with PDB sequence for positions 15-328 (PDB sequence indices), remaining positions are outside the TM zone. Subtracting 14 from AlphaFold2 sequence positions will sequentially align the structures.
10. **3zccA** - There are 2 matching entries in Uniprot O28769(unreviewed) and P0AEJ4(reviewed). We chose the reviewed entry. Uniprot reports sequence match with PDB sequence for positions 328-387 (PDB sequence indices), this matches PDB positions 229-288 in the DeepHelicon dataset. Adding 99 to AlphaFold2 sequence positions will sequentially align the structures.
11. **4a97A** - Uniprot reports sequence match with PDB sequence for positions 11-316 (PDB sequence indices). PDB in the DeepHelicon dataset start at 11, remaining positions are outside the TM zone. There is an additional residue at PDB id 154 in the DeepHelicon dataset. Adding 1 to AlphaFold2 sequence positions will sequentially align the structures.
12. **4bpdA** - Uniprot reports sequence match with PDB sequence for positions 2-122 (PDB sequence indices), remaining positions are outside the TM zone. PDB ids in DeepHelicon dataset start at -8. Subtracting 1 from AlphaFold2 sequence positions will sequentially align the structures.

<sup>1</sup> RCSB.org

**Table 1.** AlphaFold predicted structures collection - TRAIN dataset

| PDB ID | Uniprot ID | Sequence length         |      |         | Uniprot reported<br>PDB match positions | Action                                                                      |
|--------|------------|-------------------------|------|---------|-----------------------------------------|-----------------------------------------------------------------------------|
|        |            | DeepHelicon<br>dataset  | RCSB | Uniprot |                                         |                                                                             |
| 1      | 1aigL      | P0C0Y8                  | 281  | 281     | 282                                     | Subtract 1 from AlphaFold2 sequence positions                               |
| 2      | 2bhwA      | P07371                  | 232  | 232     | 269                                     | Subtract 37 from AlphaFold2 sequence positions                              |
| 3      | 2c3eA      | P02722                  | 297  | 297     | 298                                     | Subtract 1 from AlphaFold2 sequence positions                               |
| 4      | 2priA      | P00489                  | 842  | 842     | 843                                     | Subtract 1 from AlphaFold2 sequence positions                               |
| 5      | 3abvC      | D0VWV4                  | 140  | 140     | 169                                     | Subtract 26 from AlphaFold2 sequence positions                              |
| 6      | 3abvD      | A5GZW8                  | 103  | 103     | 159                                     | Subtract 23 from AlphaFold2 sequence positions                              |
| 7      | 3a3yA      | Q4H132                  | 1028 | 1028    | 1028                                    | Subtract 5 from AlphaFold2 sequence positions                               |
| 8      | 3dh4A      | P96169                  | 530  | 530     | 543                                     | Remove sequence                                                             |
| 9      | 3m71A      | P44741                  | 314  | 314     | 328                                     | Subtract 14 from AlphaFold2 sequence positions                              |
| 10     | 3zccA      | Multiple                | 114  | 114     | -                                       | Add 99 to AlphaFold2 sequence positions                                     |
| 11     | 4a97A      | P0C7B7                  | 307  | 307     | 321                                     | Add 1 to AlphaFold2 sequence positions                                      |
| 12     | 4bpdA      | P0ABN1                  | 130  | 130     | 122                                     | Subtract 1 from AlphaFold2 sequence positions                               |
| 13     | 4g7vS      | F6XHE4                  | 185  | 185     | 570                                     | Add 6 to AlphaFold2 sequence positions                                      |
| 14     | 4jkvA      | Multiple                | 475  | 475     | -                                       | Remove this sequence                                                        |
| 15     | 4jtaB      | P15387                  | 514  | 514     | -                                       | Remove sequence                                                             |
| 16     | 4phzA      | Uniprot match not found |      |         |                                         | Remove sequence                                                             |
| 17     | 4u1wA      | P19491                  | 824  | 824     | 883                                     | Subtract 21 from AlphaFold2 sequence positions                              |
| 18     | 4wd7A      | Uniprot match not found |      |         |                                         | Remove sequence                                                             |
| 19     | 5a1sA      | Uniprot match not found |      |         |                                         | Remove sequence                                                             |
| 20     | 5a44A      | P02945                  | 248  | 248     | 262                                     | Subtract 13 from AlphaFold2 sequence positions                              |
| 21     | 5iwkA      | Q9R186                  | 672  | 672     | 767                                     | Subtract 40 from AlphaFold2 sequence positions                              |
| 22     | 5khnB      | Uniprot match not found |      |         |                                         | Remove sequence                                                             |
| 23     | 5lkiA      | Q9RN43                  | 2516 | 2516    | 2516                                    | Remove sequence (Already removed in previous section)                       |
| 24     | 5l8rG      | Q9S7N7                  | 97   | 97      | 160                                     | Subtract 4 from AlphaFold2 sequence positions                               |
| 25     | 5yi2B      | Q9CDU5                  | 146  | 146     | 145                                     | Subtract 1 from AlphaFold2 sequence positions (Removed in previous section) |
| 26     | 5zdhA      | E3PJ86                  | 646  | 646     | 686                                     | Subtract 40 from AlphaFold2 sequence positions                              |
| 27     | 6bhuA      | Q8HXQ5                  | 1659 | 1659    | 1530                                    | Remove sequence                                                             |

13. **4g7vS** - Uniprot reports sequence match with PDB sequence for positions 11-182 (PDB sequence indices), remaining positions are outside the TM zone. PDB ids in DeepHelicon dataset start at 79. Adding 6 to AlphaFold2 sequence positions will sequentially align the structures.
14. **4jkvA** - Two Uniprot matches were found - P0ABE7 (length 128) and Q99835 (length 787), both are reviewed. We chose the Q99835 since it matches more residues. Uniprot reports sequence match with PDB sequence for positions 190-455 (PDB sequence indices), this would miss a few TM domains. Hence, removing the sequence.
15. **4jtaB** - Two Uniprot matches were found - P15387 (length 857) and P63142 (length 499). We chose the P63142 since it matches more residues. Uniprot does not report a sequence match with PDB sequence. From visual inspection, positions 1-266 and 303-499 match, this would miss two TM domains. Hence, removing the sequence.
16. **4phzA** - No Uniprot match was found for this sequence in RCSB hence, removing the sequence.
17. **4u1wA** - Uniprot does not report a sequence match with PDB sequence. From visual inspection, positions 25-847 match. Subtracting 21 from AlphaFold2 sequence positions will sequentially align the structures. Remaining residues and any irregularities are outside TM domains
18. **4wd7A** - No Uniprot match was found for this sequence in RCSB hence, removing the sequence.
19. **5a1sA** - No Uniprot match was found for this sequence in RCSB hence, removing the sequence.
20. **5a44A** - Uniprot reports sequence match with PDB sequence for positions 14-261 (PDB sequence indices), remaining positions are outside the TM zone. Subtracting 13 from AlphaFold2 sequence positions will sequentially align the structures.
21. **5iwkA** - Uniprot reports sequence match with PDB sequence for positions 41-709 (PDB sequence indices), remaining positions are outside the TM zone. Subtracting 40 from AlphaFold2 sequence positions will sequentially align the structures.
22. **5khnB** - No Uniprot match was found for this sequence in RCSB hence, removing the sequence.
23. **5lkiA** - This sequence is not present in AlphaFold DB, this is likely as the length of sequence is greater than 1280. More information can be found on <https://alphafold.ebi.ac.uk/faq>. Hence, removing the sequence.
24. **5l8rG** - Uniprot reports sequence match with PDB sequence for positions 62-158 (PDB sequence indices), remaining positions are outside the TM zone. Subtracting 4 from AlphaFold2 sequence positions will sequentially align the structures.
25. **5yi2B** - Uniprot reports sequence match with PDB sequence for positions 1-145 (PDB sequence indices), remaining positions are outside the TM zone. Subtracting 1 from AlphaFold2 sequence positions will sequentially align the structures.
26. **5zdhA** - Uniprot reports sequence match with PDB sequence for positions 41-686 (PDB sequence indices), remaining positions are outside the TM zone. Subtracting 40 from AlphaFold2 sequence positions will sequentially align the structures.
27. **6bhuA** - Uniprot reports sequence match with PDB sequence for positions 1-1530 (PDB sequence indices), this would miss the first two TM domains. Hence, removing the sequence.

**Table 2.** AlphaFold predicted structures collection - TEST dataset

|    | PDB ID | Uniprot ID              | Sequence length        |      |         | Uniprot reported<br>PDB match positions | Action                                         |
|----|--------|-------------------------|------------------------|------|---------|-----------------------------------------|------------------------------------------------|
|    |        |                         | DeepHelicon<br>dataset | RCSB | Uniprot |                                         |                                                |
| 1  | 1jb0L  | Q8DGB4                  | 154                    | 154  | 155     | 2-155                                   | Subtract 1 from AlphaFold2 sequence positions  |
| 2  | 3wdoA  | Uniprot match not found |                        |      |         |                                         | Remove sequence                                |
| 3  | 4bw5A  | P57789                  | 282                    | 282  | 538     | 62-335                                  | Add 5 to AlphaFold2 sequence positions         |
| 4  | 4mesA  | Uniprot match not found |                        |      |         |                                         | Remove sequence                                |
| 5  | 4phzB  | Uniprot match not found |                        |      |         |                                         | Remove sequence                                |
| 6  | 4phzK  | Uniprot match not found |                        |      |         |                                         | Remove sequence                                |
| 7  | 4q2eA  | Q9X1B7                  | 290                    | 290  | 270     | 1-270                                   | Add 20 from AlphaFold2 sequence positions      |
| 8  | 4qtnA  | D2ZZC1                  | 244                    | 244  | 263     | 28-263                                  | Subtract 25 from AlphaFold2 sequence positions |
| 9  | 5guwB  | Q59647                  | 465                    | 465  | 466     | 1-466                                   | Remove the sequence                            |
| 10 | 6awfC  | B7MKV9                  | 130                    | 130  | 131     | 1-131                                   | Subtract 1 from AlphaFold2 sequence positions  |

## 2.2. TEST dataset

The changes for the TEST dataset are summarized in Table 2.

1. **1jb0L** - Uniprot reports sequence match with PDB sequence for positions 2-155 (PDB sequence indices), remaining positions are outside the TM zone. Subtracting 1 from AlphaFold2 sequence positions will sequentially align the structures.
2. **3wdoA** - No Uniprot match was found for this sequence in RCSB hence, removing the sequence.
3. **4bw5A** - Uniprot reports sequence match with PDB sequence for positions 62-335 (PDB sequence indices), remaining positions are outside the TM zone. Adding 5 from AlphaFold2 sequence positions will sequentially align the structures.
4. **4mesA** - No Uniprot match was found for this sequence in RCSB hence, removing the sequence.
5. **4phzB** - No Uniprot match was found for this sequence in RCSB hence, removing the sequence.
6. **4phzK** - No Uniprot match was found for this sequence in RCSB hence, removing the sequence.
7. **4q2eA** - Uniprot reports sequence match with PDB sequence for positions 1-270 (PDB sequence indices), remaining positions are outside the TM zone. Adding 20 from AlphaFold2 sequence positions will sequentially align the structures.
8. **4qtnA** - Uniprot reports sequence match with PDB sequence for positions 28-263 (PDB sequence indices), remaining positions are outside the TM zone. Subtracting 25 from AlphaFold2 sequence positions will sequentially align the structures.
9. **5guwB** - Uniprot reports sequence match with PDB sequence for positions 1-466 (PDB sequence indices). There is an additional residue in Uniprot sequence at position 301, a simple offset would not sequentially align the structures, hence removing the sequence.
10. **6awfC** - Uniprot reports sequence match with PDB sequence for positions 1-359 (PDB sequence indices), remaining positions are outside the TM zone. Subtracting 1 from AlphaFold2 sequence positions will sequentially align the structures.
11. **6awfD** - Uniprot reports sequence match with PDB sequence for positions 1-359 (PDB sequence indices), remaining positions are outside the TM zone. Subtracting 1 from AlphaFold2 sequence positions will sequentially align the structures.

**Table 3.** AlphaFold predicted structures collection - PREVIOUS dataset

|    | PDB ID | Uniprot ID              | Sequence length        |      |         | Uniprot reported<br>PDB match positions | Action                                        |
|----|--------|-------------------------|------------------------|------|---------|-----------------------------------------|-----------------------------------------------|
|    |        |                         | DeepHelicon<br>dataset | RCSB | Uniprot |                                         |                                               |
| 1  | 1xqfA  | P69681                  | 418                    | 418  | 428     | 23-428                                  | Subtract 22 from AlphaFold sequence positions |
| 2  | 2rh1A  | P07550                  | 500                    | 500  | 413     | Not reported                            | Remove sequence                               |
| 3  | 2wsc2  | Q41038                  | 176                    | 269  | 269     | 1-269                                   | Remove sequence                               |
| 4  | 2xq2A  | P96169                  | 593                    | 593  | 543     | Not reported                            | Remove sequence                               |
| 5  | 2zxeA  | Q4H132                  | 1028                   | 1028 | 1028    | 1-1028                                  | Subtract 5 from AlphaFold sequence positions  |
| 6  | 3b9wA  | Q82X47                  | 407                    | 407  | 425     | 25-425                                  | Remove sequence                               |
| 7  | 3eamA  | Q7NDN8                  | 317                    | 317  | 359     | 44-359                                  | Subtract 42 from AlphaFold sequence positions |
| 8  | 3rkoL  | Uniprot match not found |                        |      |         |                                         | Remove sequence                               |
| 9  | 3rvyA  | A8EVM5                  | 285                    | 285  | 267     | 1-267                                   | Add 1000 to AlphaFold sequence positions      |
| 10 | 4q2gB  | Q9X1B7                  | 290                    | 290  | 270     | 1-270                                   | Add 20 to AlphaFold sequence positions        |
| 11 | 4twdA  | P0C7B7                  | 307                    | 307  | 321     | 11-316                                  | Add 1 to AlphaFold sequence positions         |
| 12 | 4u1xC  | P19491                  | 824                    | 824  | 883     | Not reported                            | Subtract 21 from AlphaFold sequence positions |
| 13 | 4wd8B  | Uniprot match not found |                        |      |         |                                         | Remove sequence                               |

### 2.3. PREVIOUS dataset

The changes for the PREVIOUS dataset are summarized in Table 3.

1. **1xqfA** - Uniprot reports sequence match with PDB sequence for positions 23-428 (PDB sequence indices), remaining positions are outside the TM zone. Subtracting 22 from AlphaFold2 sequence positions will sequentially align the structures.
2. **2rh1A** - Uniprot does not report a sequence match with PDB sequence. From visual inspection, positions 1-230 match. This would exclude a few TM domains hence, removing the sequence.
3. **2wsc2** - Uniprot reports sequence match with PDB sequence for positions 1-269. The sequence includes in DeepHelicon dataset matches positions 94-269. Visual inspection of experimentally determined (PDBTM) structure and AlphaFold2 structure reveal 3 helices in both. While DeepHelicon dataset annotates 2 helices. It is likely that the annotations were updated, hence remove this sequence as a missing helix will lead to inaccurate reporting of a lower AlphaFold2 performance.
4. **2xq2A** - Uniprot does not report a sequence match with PDB sequence. From visual inspection, positions 1- 543 match. This would exclude the last TM domain hence, removing the sequence.
5. **2zxeA** - Uniprot reports a sequence match with PDB sequence for positions 1-1028 (entire sequence). PDB IDs in DeepHelicon dataset start at -4. Subtracting 5 from AlphaFold2 sequence positions will sequentially align the structures.
6. **3b9wA** - Uniprot reports a sequence match with PDB sequence for positions 1-450. There is a discrepancy of 7 residues within TM domain hence, removing the sequence.
7. **3eamA** - Uniprot reports a sequence match with PDB sequence for positions 44-359. PDB ID 44 according to Uniprot matches PDB ID 2 in DeepHelicon dataset. Subtracting 42 from AlphaFold2 sequence positions will sequentially align the structures.
8. **3rkoL** - No Uniprot match was found for this sequence in RCSB hence, removing the sequence.
9. **3rvyA** - Uniprot reports a sequence match with PDB sequence for positions 1-267. PDB 1 according to Uniprot matches PDB ID 1001 in DeepHelicon dataset. Adding 1000 to AlphaFold2 sequence positions will sequentially align the structures. Remaining residues are outside TM domains.
10. **4q2gB** - Uniprot reports a sequence match with PDB sequence for positions 1-270. Adding 20 to AlphaFold2 sequence positions will sequentially align the structures. Remaining residues are outside TM domains.
11. **4twdA** - Uniprot reports a sequence match with PDB sequence for positions 11-316. In DeepHelicon dataset, PDB ID starts at 11. However, there is an additional residue at position 154. Adding 1 to AlphaFold2 sequence positions will sequentially align the structures for all positions in the TM domains.
12. **4u1xC** - Uniprot does not report a sequence match with PDB sequence. From visual inspection, positions 25-847 match. Subtracting 21 from AlphaFold2 sequence positions will sequentially align the structures. Remaining residues and any irregularities are outside TM domains.
13. **4wd8B** - No Uniprot match was found for this sequence in RCSB hence, removing the sequence.

### 3. Inter-helical tilt angle ( $\theta$ )

For a residue pair, inter-helical tilt angle is defined as the angle between the helices the residues reside on (Lee et al., 2007). In an  $\alpha$ -helix, each main-chain  $C=O$  and  $N-H$  group is hydrogen bonded to a peptide bond four residues away i.e.  $O(i)$  to  $N(i+4)$  (where  $i$  is the  $i^{th}$  residue). The peptide planes are roughly parallel with the helical axis and the dipoles within the helix are aligned, i.e. all  $C=O$  point in the same direction and all  $N-H$  point in the other direction, while the side chains point outward from the helical axis (generally oriented towards the amino-terminal) (Cooper, 1995). This bond pattern is depicted in Fig. 1a.

Motivated by this observation, we compute any helical axis orientation by averaging the direction of  $C(i) = O(i) - N(i+4)$  for all residues in the helix. The angle between the axes of two helices is the inter-helical tilt angle. Fig. 1b shows the inter-helical tilt angle between two helical axes. We use the Pymol package for these computations (Schrödinger, LLC, 2015a,b,c).

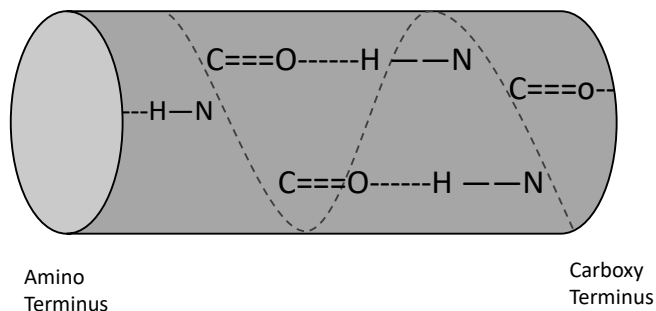

(a) Toilet roll representation of main chain hydrogen bonding in alpha-helix, adapted from Cooper (1995)

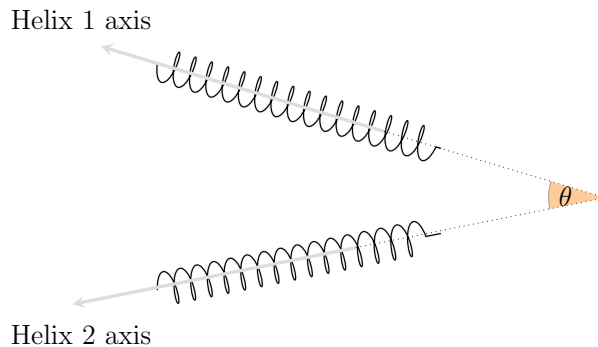

(b) Inter-helical tilt angle  $\theta$  between the two helical axes

Fig. 1: Inter helical tilt angle <sup>2</sup>

### 4. Relative residue angle ( $\delta$ )

We defined a residue's plane as formed by the vector between  $C_\alpha$  and  $N$  atom and the vector between  $C_\alpha$  and  $C$  atom of the carboxyl group (Mahbub and Bayzid, 2021). For a residue pair, we define the relative residue angle as the absolute angle between the surface-normals of the residue planes (Sawhney et al., 2023). The angle is represented as  $\delta$  in Fig. 2.

### 5. Cross validation - random seeds

We use 5 fold cross validation in our experiments. During cross validation the dataset is split into 5 equal parts, in each fold the classifier is trained on 4 parts while tested on the remaining one. Since there are 5 folds, all samples are tested on once. In our implementation, which uses Scikit-learn (Sklearn KFold, 2023), random seed is used to determine how the dataset is partitioned. Hence, it determines for a fold which sequences are used for training and which are tested on. We provide the seeds here for reproducibility. These were used for both coordinate as features (CF) and structurally derived features (SDF). Since, the cross validation experiment was repeated 5 times, 5 seeds for each dataset are reported here.

<sup>2</sup> First published in Lecture Notes in Computer Science [Volume 13920, Chapter 25] by Springer Nature Switzerland AG 2023

<sup>3</sup> First published in Lecture Notes in Computer Science [Volume 13920, Chapter 25] by Springer Nature Switzerland AG 2023

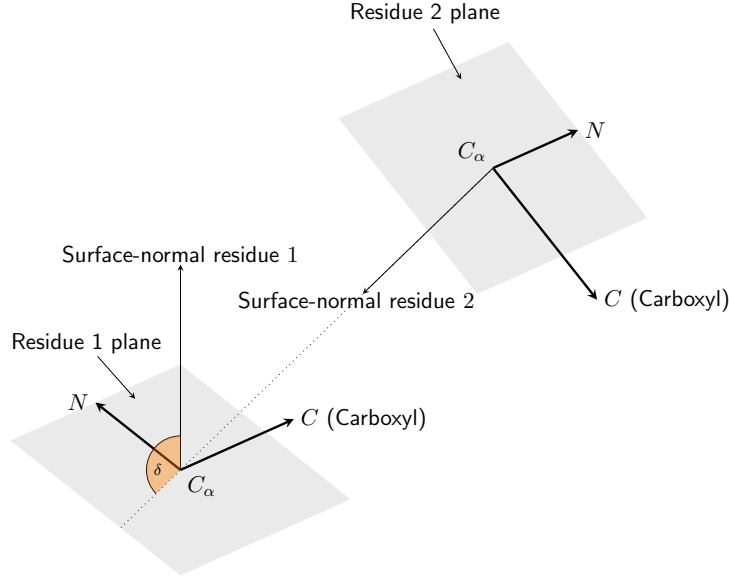

Fig. 2: Relative residue angle ( $\delta$ ) - Angle between the Surface-normals to the residue planes <sup>3</sup>

**Table 4.** Random seeds used in cross validation experiments.

| Dataset  | Iteration 1 | Iteration 2 | Iteration 3 | Iteration 4 | Iteration 5 |
|----------|-------------|-------------|-------------|-------------|-------------|
| TRAIN    | 3768687247  | 3744768744  | 3956695393  | 4112525849  | 2458923456  |
| TEST     | 2909617570  | 3986826679  | 4141477286  | 1589146018  | 1833799150  |
| PREVIOUS | 4134222515  | 3265073376  | 2352221702  | 1732390130  | 2614245227  |

## 6. Classification results

### 6.1. Cross validation - L thresholds

We report the results for the cross validation experiments in terms of precision and recall in Table 5, where precision and recall are defined as follows :-

$$Precision = \frac{TP}{TP + FP} \quad \& \quad Recall = \frac{TP}{TP + FN} \quad (1)$$

where  $TP$  is the number of true positives,  $FP$  is the number of false positives and  $FN$  is the number of false negatives at a particular threshold. Precision and recall were computed for the top  $L$ ,  $L/2$ ,  $L/5$ ,  $L/10$  residue pair predictions where  $L$  denoted the total concatenated length of the TM helices for a sequence. For all metrics, we report the mean value across all sequences.

### 6.2. Held out results - L thresholds

We report the results for the cross validation experiments in terms of precision and recall in Table 6. For all metrics, we report the mean value across all sequences.

### 6.3. Held out results - per sequence results

Here we report the per sequence results for the held out experiments in terms of Average precision and AUC-ROC. We compare the performance of Structurally derived features constructed using AlphaFold2 predicted structures (SDF +AF), coordinates as features from AlphaFold2 predicted structures (CF+ AF) and AlphaFold2 label annotations (AF2).

#### 6.3.1. TEST dataset

The results for TEST dataset are reported in Table 7.

#### 6.3.2. PREVIOUS dataset

The results for PREVIOUS dataset are reported in Table 8.

## 7. Classifier divergence

Here we design an experiment to assess why a classifier trained using SDF rather than CF can improve on AlphaFold’s contact prediction performance. We train a classifier using features constructed from experimentally derived structures but during testing, only features

**Table 5.** Classification performance - average over 5 fold Cross validation (repeated 5 times) in terms of precision and recall at L thresholds

| Classifier           | Structure source | Feature type | L/10          |               | L/5           |               | L/2           |               | L/1           |               |
|----------------------|------------------|--------------|---------------|---------------|---------------|---------------|---------------|---------------|---------------|---------------|
|                      |                  |              | Precision     | Recall        | Precision     | Recall        | Precision     | Recall        | Precision     | Recall        |
| NN                   | Exp.             | SDF          | 0.9859±0.0140 | 0.1313±0.0310 | 0.9725±0.0239 | 0.2211±0.0297 | 0.9463±0.0343 | 0.4657±0.0306 | 0.8538±0.0342 | 0.7474±0.0264 |
| NN                   | AF               | SDF          | 0.9585±0.0192 | 0.1245±0.0290 | 0.9454±0.0256 | 0.2119±0.0299 | 0.9114±0.0339 | 0.4446±0.0285 | 0.8174±0.0338 | 0.7157±0.0254 |
| NN                   | Exp.             | CF           | 0.9750±0.0201 | 0.1248±0.0274 | 0.9604±0.0291 | 0.2143±0.0277 | 0.9063±0.0371 | 0.4387±0.0265 | 0.7742±0.0362 | 0.6780±0.0243 |
| NN                   | AF               | CF           | 0.9511±0.0206 | 0.1211±0.0286 | 0.9372±0.0266 | 0.2085±0.0294 | 0.8834±0.0338 | 0.4255±0.0281 | 0.7574±0.0333 | 0.6629±0.0261 |
| (a) TRAIN dataset    |                  |              |               |               |               |               |               |               |               |               |
| Classifier           | Structure source | Feature type | L/10          |               | L/5           |               | L/2           |               | L/1           |               |
|                      |                  |              | Precision     | Recall        | Precision     | Recall        | Precision     | Recall        | Precision     | Recall        |
| NN                   | Exp.             | SDF          | 0.9997±0.0014 | 0.0885±0.0145 | 0.9992±0.0017 | 0.1724±0.0275 | 0.9881±0.0101 | 0.4142±0.0608 | 0.9085±0.0491 | 0.7098±0.0515 |
| NN                   | AF               | SDF          | 0.9869±0.0132 | 0.0875±0.0144 | 0.9840±0.0158 | 0.1696±0.0269 | 0.9670±0.0179 | 0.4045±0.0582 | 0.8826±0.0474 | 0.6907±0.0520 |
| NN                   | Exp.             | CF           | 0.9861±0.0239 | 0.0877±0.0142 | 0.9779±0.0278 | 0.1682±0.0255 | 0.9340±0.0407 | 0.3850±0.0482 | 0.8068±0.0556 | 0.6306±0.0522 |
| NN                   | AF               | CF           | 0.9879±0.0147 | 0.0868±0.0141 | 0.9830±0.0163 | 0.1679±0.0262 | 0.9455±0.0261 | 0.3887±0.0534 | 0.8212±0.0453 | 0.6400±0.0539 |
| DeepHelicon          | -                | -            | 0.8910±0.0413 | 0.0744±0.0108 | 0.8509±0.0443 | 0.1366±0.0176 | 0.7632±0.0479 | 0.2957±0.0307 | 0.6303±0.0469 | 0.4790±0.0414 |
| (b) TEST dataset     |                  |              |               |               |               |               |               |               |               |               |
| Classifier           | Structure source | Feature type | L/10          |               | L/5           |               | L/2           |               | L/1           |               |
|                      |                  |              | Precision     | Recall        | Precision     | Recall        | Precision     | Recall        | Precision     | Recall        |
| NN                   | Exp.             | SDF          | 0.9985±0.0038 | 0.0786±0.0155 | 0.9979±0.0030 | 0.1529±0.0282 | 0.9805±0.0227 | 0.3538±0.0420 | 0.9376±0.0389 | 0.6376±0.0468 |
| NN                   | AF               | SDF          | 0.9770±0.0226 | 0.0769±0.0151 | 0.9745±0.0224 | 0.1485±0.0260 | 0.9558±0.0345 | 0.3434±0.0417 | 0.9074±0.0389 | 0.6178±0.0520 |
| NN                   | Exp.             | CF           | 0.9697±0.0337 | 0.0750±0.0123 | 0.9592±0.0390 | 0.1438±0.0224 | 0.9240±0.0487 | 0.3277±0.0364 | 0.8368±0.0524 | 0.5656±0.0466 |
| NN                   | AF               | CF           | 0.9775±0.0293 | 0.0769±0.0152 | 0.9689±0.0250 | 0.1464±0.0238 | 0.9363±0.0357 | 0.3323±0.0349 | 0.8568±0.0406 | 0.5827±0.0431 |
| DeepHelicon          | -                | -            | 0.9235±0.0336 | 0.0715±0.0128 | 0.8905±0.0318 | 0.1340±0.0230 | 0.7933±0.0412 | 0.2801±0.0350 | 0.6541±0.0441 | 0.4450±0.0470 |
| (c) PREVIOUS dataset |                  |              |               |               |               |               |               |               |               |               |

**Table 6.** Classification performance - held out datasets in terms of precision and recall at L thresholds

| Classifier           | Structure source | Feature type | L/10      |        | L/5       |        | L/2       |        | L/1       |        |
|----------------------|------------------|--------------|-----------|--------|-----------|--------|-----------|--------|-----------|--------|
|                      |                  |              | Precision | Recall | Precision | Recall | Precision | Recall | Precision | Recall |
| NN                   | Exp.             | SDF          | 1.0       | 0.0887 | 1.0       | 0.1730 | 0.9917    | 0.4171 | 0.9207    | 0.7204 |
| NN                   | AF               | SDF          | 0.9918    | 0.0880 | 0.9877    | 0.1702 | 0.9724    | 0.4069 | 0.8966    | 0.7024 |
| NN                   | Exp.             | CF           | 0.9878    | 0.0868 | 0.9769    | 0.1667 | 0.9334    | 0.3847 | 0.8005    | 0.6250 |
| NN                   | AF               | CF           | 0.9745    | 0.0860 | 0.9567    | 0.1628 | 0.9054    | 0.3719 | 0.7625    | 0.5982 |
| DeepHelicon          | -                | -            | 0.8910    | 0.0745 | 0.8509    | 0.1368 | 0.7630    | 0.2960 | 0.6300    | 0.4791 |
| (a) TEST dataset     |                  |              |           |        |           |        |           |        |           |        |
| Classifier           | Structure source | Feature type | L/10      |        | L/5       |        | L/2       |        | L/1       |        |
|                      |                  |              | Precision | Recall | Precision | Recall | Precision | Recall | Precision | Recall |
| NN                   | Exp.             | SDF          | 1.0       | 0.0787 | 1.0       | 0.1534 | 0.9843    | 0.3562 | 0.9479    | 0.6455 |
| NN                   | AF               | SDF          | 0.9814    | 0.0776 | 0.9815    | 0.1491 | 0.9610    | 0.3453 | 0.9174    | 0.6246 |
| NN                   | Exp.             | CF           | 0.9964    | 0.0784 | 0.9762    | 0.1457 | 0.9396    | 0.3323 | 0.8351    | 0.5660 |
| NN                   | AF               | CF           | 0.9724    | 0.0768 | 0.9614    | 0.1458 | 0.9061    | 0.324  | 0.7943    | 0.5437 |
| DeepHelicon          | -                | -            | 0.9235    | 0.0715 | 0.8905    | 0.1340 | 0.7932    | 0.2801 | 0.6541    | 0.4450 |
| (b) PREVIOUS dataset |                  |              |           |        |           |        |           |        |           |        |

constructed from AlphaFold predicted structures will be available to us. Consequently, classifier’s testing performance depends on whether the feature distributions from the two sources are similar.

We assessed this via a second classifier’s ability to differentiate between features generated using the two sources (AlphaFold & Experimental). Features constructed using experimentally determined structures are annotated with a label of 1, while those generated using AlphaFold’s predicted structures are annotated as 0.

We also created a third set of features - Subtracted coordinates as features (SCF) i.e. the euclidean distance between the 3-d coordinates of corresponding heavy atoms. For a residue pair position (i, j), where i, j are amino acid sequence positions, s.t.  $|i - j| > 5$  and i and j are on separate helices (inter-helical), we select a neighborhood window of size  $3 \times 3$  around it. For each of the eight positions around (i, j) (excluding the center (i, j)), we constructed a feature vector of length 12 - consisting of difference between the x, y, z coordinates of the corresponding heavy atoms ( $N, C_\alpha, O$  &  $C_\beta$ ) from each residue in the pair of interest. We concatenated features for these eight

**Table 7.** Per sequence results TEST dataset

| Sequence name | Average Precision |        |        | AUC-ROC |        |        |
|---------------|-------------------|--------|--------|---------|--------|--------|
|               | SDF+AF            | CF+AF  | AF2    | SDF+AF  | CF+AF  | AF2    |
| 1xqfA         | 0.8994            | 0.7646 | 0.8523 | 0.9967  | 0.9898 | 0.9840 |
| 2cfqA         | 0.7844            | 0.6119 | 0.6326 | 0.9936  | 0.9852 | 0.9093 |
| 2jlnA         | 0.9266            | 0.7283 | 0.8318 | 0.9981  | 0.9890 | 0.9767 |
| 2nq2A         | 0.9607            | 0.7606 | 0.8854 | 0.9986  | 0.9902 | 0.9782 |
| 2r6gF         | 0.9291            | 0.7645 | 0.8215 | 0.9986  | 0.9930 | 0.9666 |
| 2r6gG         | 0.9363            | 0.8253 | 0.7867 | 0.9977  | 0.9937 | 0.9531 |
| 2w2eA         | 0.9514            | 0.8033 | 0.9019 | 0.9970  | 0.9893 | 0.9740 |
| 2wswA         | 0.9487            | 0.7445 | 0.9124 | 0.9988  | 0.9921 | 0.9802 |
| 2yevA         | 0.9520            | 0.7753 | 0.8661 | 0.9992  | 0.9954 | 0.9723 |
| 2yvxA         | 0.8670            | 0.8029 | 0.7042 | 0.9945  | 0.9882 | 0.9208 |
| 2z73A         | 0.9590            | 0.7615 | 0.9289 | 0.9982  | 0.9887 | 0.9823 |
| 2zxeA         | 0.9275            | 0.7308 | 0.8320 | 0.9979  | 0.9896 | 0.9443 |
| 2zy9A         | 0.8934            | 0.7571 | 0.7488 | 0.9939  | 0.9856 | 0.9370 |
| 3c02A         | 0.9679            | 0.8305 | 0.9491 | 0.9989  | 0.9920 | 0.9867 |
| 3ddlA         | 0.9358            | 0.7723 | 0.8479 | 0.9973  | 0.9880 | 0.9543 |
| 3eamA         | 0.9358            | 0.8029 | 0.9171 | 0.9972  | 0.9880 | 0.9879 |
| 3gd8A         | 0.9626            | 0.8537 | 0.9319 | 0.9985  | 0.9926 | 0.9865 |
| 3giaA         | 0.8930            | 0.7276 | 0.7451 | 0.9937  | 0.9897 | 0.9292 |
| 3hd6A         | 0.9600            | 0.7989 | 0.9040 | 0.9989  | 0.9927 | 0.9813 |
| 3k3fA         | 0.9567            | 0.8179 | 0.9601 | 0.9984  | 0.9916 | 0.9870 |
| 3klyA         | 0.9123            | 0.7660 | 0.8555 | 0.9955  | 0.9889 | 0.9656 |
| 3qe7A         | 0.6110            | 0.5132 | 0.5278 | 0.9758  | 0.9806 | 0.8905 |
| 3rvyA         | 0.8510            | 0.7853 | 0.8690 | 0.9949  | 0.9920 | 0.9592 |
| 3t9nA         | 0.9828            | 0.8554 | 0.9688 | 0.9994  | 0.9949 | 0.9996 |
| 3tijA         | 0.9601            | 0.7691 | 0.9176 | 0.9989  | 0.9917 | 0.9923 |
| 3usiA         | 0.9402            | 0.7577 | 0.8672 | 0.9982  | 0.9923 | 0.9646 |
| 3v5uA         | 0.9666            | 0.8064 | 0.9105 | 0.9991  | 0.9929 | 0.9791 |
| 4czbB         | 0.9353            | 0.7515 | 0.8229 | 0.9984  | 0.9923 | 0.9677 |
| 4hygA         | 0.9440            | 0.7814 | 0.7946 | 0.9981  | 0.9902 | 0.9444 |
| 4ikwA         | 0.9580            | 0.7674 | 0.9033 | 0.9993  | 0.9944 | 0.9807 |
| 4m5bA         | 0.9653            | 0.8197 | 0.9591 | 0.9985  | 0.9903 | 0.9874 |
| 4q2gB         | 0.9285            | 0.7964 | 0.8739 | 0.9981  | 0.9932 | 0.9805 |
| 4r0cB         | 0.9438            | 0.7665 | 0.8763 | 0.9986  | 0.9934 | 0.9649 |
| 4twdA         | 0.9543            | 0.6924 | 0.8341 | 0.9944  | 0.9762 | 0.9692 |
| 4u1xC         | 0.7902            | 0.8396 | 0.7134 | 0.9949  | 0.9965 | 0.9122 |

neighboring positions to construct a feature vector of length 96 ( $12 \times 8$ ).

As is common practice, features from either feature set (SDF, CF or SCF) are first normalized to a  $[0, 1]$  scale before being used for classification, such that  $f_{i_{scaled}}^t = \frac{f_i^t - \min(f_i)}{\max(f_i) - \min(f_i)}$  where  $f_i^t$  is the  $t^{th}$  sample for the feature  $f_i$ ,  $\max(\cdot)$  and  $\min(\cdot)$  compute the maximum and minimum observed value for the feature  $f_i$  and  $f_{i_{scaled}}^t$  represents the scaled value of  $t^{th}$  sample for the feature  $f_i$ .

We train a Logistic Regression classifier (Scikit-learn Logistic, 2023; Wikipedia Logistic, 2023) using SAGA solver (Scikit-learn Logistic, 2023; Defazio et al., 2014) and assess the performance on each dataset - TRAIN (154 sequences), TEST (49 sequences) and PREVIOUS (34 sequences) using 5 fold cross validation (James et al., 2013; Friedman et al., 2001; Kohavi et al., 1995). In each fold, 80% of randomly selected training sequences are used for training and 20% are held out for validation. We used the Scikit-learn package for our implementation (Pedregosa et al., 2011).

### Performance metrics

We measured Logistic Regression’s ability to identify the sources of the structures using: -

1. Accuracy - Accuracy is the fraction of the correct predictions and is defined as

$$\text{Accuracy}(y, \hat{y}) = \frac{1}{N} \sum_{i=0}^{N-1} l ; \begin{cases} l = 1, & \text{if } \hat{y}_i = y_i \\ l = 0, & \text{otherwise} \end{cases} \quad (2)$$



**Table 8.** Per sequence results PREVIOUS dataset

| Sequence name | Average Precision |        |        | AUC-ROC |        |        |
|---------------|-------------------|--------|--------|---------|--------|--------|
|               | SDF+AF            | CF+AF  | AF2    | SDF+AF  | CF+AF  | AF2    |
| 1jb0L         | 0.9496            | 0.8778 | 0.9341 | 0.9947  | 0.9878 | 0.9790 |
| 2a06C         | 0.9742            | 0.7724 | 0.9150 | 0.9994  | 0.9929 | 0.9820 |
| 2a65A         | 0.9404            | 0.7683 | 0.8692 | 0.9986  | 0.9931 | 0.9656 |
| 2abmA         | 0.9640            | 0.8029 | 0.8992 | 0.9984  | 0.9883 | 0.9812 |
| 2aczC         | 0.9315            | 0.7711 | 0.8600 | 0.9968  | 0.9787 | 0.9821 |
| 2aczD         | 0.9178            | 0.8821 | 0.8553 | 0.9976  | 0.9944 | 0.9893 |
| 2axtB         | 0.9770            | 0.8290 | 0.8690 | 0.9994  | 0.9936 | 0.9743 |
| 2axtZ         | 1.0000            | 0.9382 | 0.9524 | 1.0000  | 0.9972 | 0.9986 |
| 2bs2C         | 0.9762            | 0.7382 | 0.9525 | 0.9984  | 0.9891 | 0.9861 |
| 2zuqA         | 0.9160            | 0.7892 | 0.7430 | 0.9858  | 0.9727 | 0.9032 |
| 3abkA         | 0.9575            | 0.7648 | 0.8861 | 0.9989  | 0.9932 | 0.9785 |
| 3b4rA         | 0.9387            | 0.7899 | 0.7987 | 0.9976  | 0.9917 | 0.9561 |
| 3mp7A         | 0.8597            | 0.6959 | 0.7066 | 0.9969  | 0.9900 | 0.9468 |
| 3o7pA         | 0.9470            | 0.7905 | 0.8664 | 0.9986  | 0.9930 | 0.9647 |
| 3tuiA         | 0.9386            | 0.8043 | 0.8249 | 0.9984  | 0.9930 | 0.9713 |
| 3ux4A         | 0.9396            | 0.7666 | 0.8159 | 0.9967  | 0.9881 | 0.9453 |
| 4a4mA         | 0.9538            | 0.7603 | 0.8598 | 0.9986  | 0.9883 | 0.9793 |
| 4bw5A         | 0.8962            | 0.5870 | 0.8489 | 0.9987  | 0.9903 | 0.9723 |
| 4dntA         | 0.9393            | 0.7154 | 0.7968 | 0.9983  | 0.9902 | 0.9425 |
| 4dxwA         | 0.8580            | 0.6686 | 0.7199 | 0.9920  | 0.9820 | 0.8768 |
| 4fc4A         | 0.9493            | 0.7659 | 0.9567 | 0.9985  | 0.9915 | 0.9900 |
| 4he8D         | 0.9592            | 0.8991 | 0.7404 | 0.9992  | 0.9979 | 0.9291 |
| 4he8F         | 0.9372            | 0.7787 | 0.8388 | 0.9986  | 0.9939 | 0.9589 |
| 4j05A         | 0.9100            | 0.7078 | 0.8057 | 0.9970  | 0.9888 | 0.9550 |
| 4kppA         | 0.9032            | 0.7516 | 0.7845 | 0.9963  | 0.9930 | 0.9478 |
| 4oqyA         | 0.9143            | 0.8200 | 0.7997 | 0.9969  | 0.9932 | 0.9251 |
| 4pgxA         | 0.7050            | 0.6341 | 0.6003 | 0.9560  | 0.9721 | 0.8609 |
| 4q2eA         | 0.9163            | 0.7841 | 0.8327 | 0.9975  | 0.9920 | 0.9659 |
| 4rp8A         | 0.9442            | 0.8009 | 0.9109 | 0.9983  | 0.9931 | 0.9768 |
| 4ryiA         | 0.9632            | 0.7785 | 0.8731 | 0.9984  | 0.9828 | 0.9572 |
| 4tquM         | 0.9564            | 0.7891 | 0.9413 | 0.9986  | 0.9902 | 0.9763 |
| 4xksA         | 0.9306            | 0.7197 | 0.8626 | 0.9955  | 0.9788 | 0.9641 |
| 4ymsD         | 0.9612            | 0.7968 | 0.8870 | 0.9986  | 0.9904 | 0.9726 |
| 5a8eA         | 0.9240            | 0.7490 | 0.8505 | 0.9981  | 0.9919 | 0.9711 |
| 5b57A         | 0.9476            | 0.7255 | 0.8718 | 0.9985  | 0.9912 | 0.9703 |
| 5c6nA         | 0.8470            | 0.7214 | 0.6172 | 0.9963  | 0.9931 | 0.9064 |
| 5doqA         | 0.9670            | 0.7635 | 0.9390 | 0.9988  | 0.9878 | 0.9820 |
| 5gufA         | 0.9609            | 0.8064 | 0.9030 | 0.9985  | 0.9866 | 0.9884 |
| 5jkiA         | 0.9323            | 0.8306 | 0.7074 | 0.9958  | 0.9871 | 0.8583 |
| 5kbwA         | 0.9365            | 0.8196 | 0.8741 | 0.9968  | 0.9854 | 0.9794 |
| 5l26A         | 0.9537            | 0.7456 | 0.8990 | 0.9990  | 0.9923 | 0.9869 |
| 5o0tA         | 0.9089            | 0.6827 | 0.7740 | 0.9960  | 0.9857 | 0.9357 |
| 5x5yG         | 0.7728            | 0.6941 | 0.5963 | 0.9926  | 0.9877 | 0.8948 |
| 5xjjA         | 0.9319            | 0.7746 | 0.8309 | 0.9984  | 0.9932 | 0.9605 |
| 5xu1M         | 0.8917            | 0.7575 | 0.6992 | 0.9918  | 0.9858 | 0.9187 |
| 6awfC         | 0.9571            | 0.7714 | 0.8866 | 0.9980  | 0.9884 | 0.9568 |
| 6awfD         | 0.8955            | 0.8371 | 0.8060 | 0.9963  | 0.9918 | 0.9819 |
| 6barA         | 0.8789            | 0.7059 | 0.8053 | 0.9657  | 0.9770 | 0.9313 |
| 6cb2A         | 0.9754            | 0.8544 | 0.8826 | 0.9991  | 0.9947 | 0.9736 |

where  $\hat{y}_i$  is the predicted label for the  $i^{th}$  sample and  $y_i$  is the corresponding true label (Scikit-accuracy, 2023) and  $N$  is the total number of samples. If the features generated using AlphaFold predicted structures and experimentally determined structures are entirely indistinguishable to the classifier, it will have an accuracy score 0.5.

2. Classifier divergence - Here our objective is to measure how distinguishable are the features generated using the two structural sources. For our purpose, an accuracy score  $A$  and  $1 - A$  are equivalent. We define a metric Divergence that accounts for this.

$$Divergence = 2 \times |Accuracy - 0.5| \quad (3)$$

If features generated using AlphaFold predicted structures and experimentally determined structures are indistinguishable, classifier's divergence score is 0.0. While if the classifier can perfectly distinguish between the two its divergence score is 1.0. Divergence score with variation in accuracy is depicted in Figure 3.

### 7.1. Results

In Table 9, we report a Logistic Regression classifier's ability to distinguish between features generated using AlphaFold and experimentally determined structures. We report average 5 fold cross validation performance in terms of accuracy and classifier divergence. CF constructed using AlphaFold and experimentally determined structures are very divergent or easy for the classifier to distinguish, with a divergence score of 0.49, 0.47 & 0.77 for TRAIN, TEST & PREVIOUS respectively. While SDF constructed using AlphaFold and experimentally determined structures are very hard for the classifier to distinguish with a divergence score 0.029, 0.0375 & 0.0314 for TRAIN, TEST & PREVIOUS datasets. SCF are far less divergent than CF with a divergence score of 0.06, 0.09 & 0.09 for TRAIN, TEST & PREVIOUS datasets.

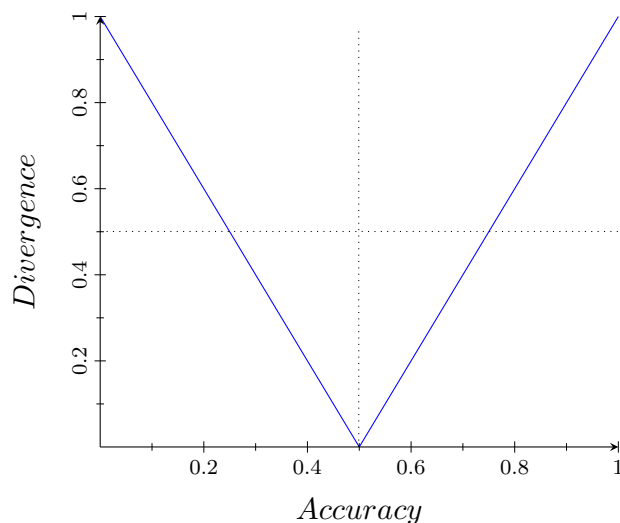

Fig. 3: Classifier divergence as a function of accuracy.

**Table 9.** Classifier divergence - How well can a classifier differentiate between AlphaFold predicted and Experimental structures?

| Features         | TRAIN               |                     | TEST                |                     | PREVIOUS            |                     |
|------------------|---------------------|---------------------|---------------------|---------------------|---------------------|---------------------|
|                  | Accuracy            | Divergence          | Accuracy            | Divergence          | Accuracy            | Divergence          |
| SDF <sup>5</sup> | 0.5145 $\pm$ 0.0067 | 0.0290 $\pm$ 0.0133 | 0.5187 $\pm$ 0.0066 | 0.0375 $\pm$ 0.0132 | 0.5157 $\pm$ 0.0062 | 0.0314 $\pm$ 0.0125 |
| CF <sup>6</sup>  | 0.7467 $\pm$ 0.0299 | 0.4934 $\pm$ 0.0597 | 0.7365 $\pm$ 0.0884 | 0.4731 $\pm$ 0.1768 | 0.8859 $\pm$ 0.0325 | 0.7717 $\pm$ 0.0651 |
| SCF <sup>7</sup> | 0.5315 $\pm$ 0.0231 | 0.0629 $\pm$ 0.0461 | 0.5456 $\pm$ 0.0320 | 0.0912 $\pm$ 0.0640 | 0.4559 $\pm$ 0.0381 | 0.0943 $\pm$ 0.0665 |

## 8. Improvement example - 4g7vS

Phosphatidylinositol-3,4,5-trisphosphate 3-phosphatase (UniprotKB id - F6XHE4 in TRAIN dataset) from the organism - Transparent sea squirt (*Ciona intestinalis*), is a TM protein chain with 4  $\alpha$ -helices. It is involved in monoatomic ion channel activity and phosphorylation (Uniprot - 4g7vS, 2023).

In this section, we illustrate how using a classifier trained on SDF from experimentally derived features can improve AlphaFold's predicted structure for 4g7vS. In Figure 4a, we depict a part of the interaction (183-194 & 161-165) between Helix 2 (PDB IDs 149-167) and Helix

3 (PDB IDs 183-204) as inferred from experimentally determined structure. In Figure 4b, the interaction inferred using AlphaFold’s predicted structure are represented. AlphaFold’s precision and recall (Wikipedia Precision, 2023) for this sequence are 0.6640 and 0.7442 respectively. AlphaFold incorrectly predicts 164 & 186 and 164 & 190 as contact points. In Figure 4c, we represent the same part of the interaction between Helix 2 and Helix 3 when a classifier (5 fold cross validation experiment) trained using SDF is used to predict this sequence’s contact map. We chose a threshold that maximized F1 score (Wikipedia F-score, 2023; Sklearn F1, 2023), and using this threshold we make binary prediction for interactions, which achieves a precision and recall score of 0.7033 & 0.7442 respectively. Two false contact points between residue pairs 164-186 & 164-190 are correctly removed, at the cost of missing a true contact point between 165-183, resulting in an overall higher precision score.

The case study seems to suggest that using a residue pair’s neighborhood structural information, the classifier is able to better account for atomic space constraints adjusting predicted contact propensities leading to a more accurate predicted structure.

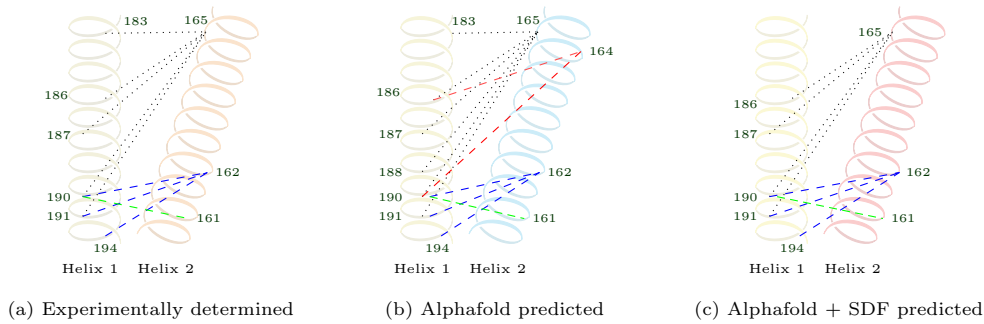

Fig. 4: Sequence 4g7vS (TRAIN dataset) partly represented. Contact points are indicated by connecting line segments.

## References

- AlphaFold DB. AlphaFold protein structure database. <https://alphafold.ebi.ac.uk/>, 2022. (Accessed on 05/23/2023).
- H. M. Berman, T. Battistuz, T. N. Bhat, W. F. Bluhm, P. E. Bourne, K. Burkhardt, Z. Feng, G. L. Gilliland, L. Iype, S. Jain, et al. The protein data bank. *Acta Crystallographica Section D: Biological Crystallography*, 58(6):899–907, 2002.
- S. K. Burley, C. Bhikadiya, C. Bi, S. Bittrich, H. Chao, L. Chen, P. A. Craig, G. V. Crichlow, K. Dalenberg, J. M. Duarte, et al. Rcsb protein data bank (rcsb.org): delivery of experimentally-determined pdb structures alongside one million computed structure models of proteins from artificial intelligence/machine learning. *Nucleic Acids Research*, 51(D1):D488–D508, 2023.
- J. Cooper. Alpha-Helix Geometry Part. 2 — cryst.bbk.ac.uk. [http://www.cryst.bbk.ac.uk/PPS95/course/3\\_geometry/helix2.html](http://www.cryst.bbk.ac.uk/PPS95/course/3_geometry/helix2.html), 1995. [Accessed 25-Jan-2022].
- A. Defazio, F. Bach, and S. Lacoste-Julien. Saga: A fast incremental gradient method with support for non-strongly convex composite objectives. *Advances in neural information processing systems*, 27, 2014.
- B. Faezov and R. L. Dunbrack Jr. Pdbrenum: A webserver and program providing protein data bank files renumbered according to their uniprot sequences. *PLoS One*, 16(7):e0253411, 2021.
- J. Friedman, T. Hastie, R. Tibshirani, et al. *The elements of statistical learning*, volume 1. Springer series in statistics New York, 2001.
- G. James, D. Witten, T. Hastie, and R. Tibshirani. *An introduction to statistical learning*, volume 112. Springer, 2013.
- R. Kohavi et al. A study of cross-validation and bootstrap for accuracy estimation and model selection. In *Ijcai*, volume 14, pages 1137–1145. Montreal, Canada, 1995.
- H. S. Lee, J. Choi, and S. Yoon. Qhelix: a computational tool for the improved measurement of inter-helical angles in proteins. *The protein journal*, 26(8):556–561, 2007.
- S. Mahbub and M. S. Bayzid. Egret: Edge aggregated graph attention networks and transfer learning improve protein-protein interaction site prediction. *bioRxiv*, pages 2020–11, 2021.
- F. Pedregosa, G. Varoquaux, A. Gramfort, V. Michel, B. Thirion, O. Grisel, M. Blondel, P. Prettenhofer, R. Weiss, V. Dubourg, J. Vanderplas, A. Passos, D. Cournapeau, M. Brucher, M. Perrot, and E. Duchesnay. Scikit-learn: Machine learning in Python. *Journal of Machine Learning Research*, 12:2825–2830, 2011.
- A. Sawhney, J. Li, and L. Liao. Inter-helical residue contact prediction in  $\alpha$ -helical transmembrane proteins using structural features. In press, Lecture Notes in Bioinformatics (LNBI), 10th International Work-Conference on Bioinformatics and Biomedical Engineering (IWBBIO), 2023.
- Schrödinger, LLC. The AxPyMOL molecular graphics plugin for Microsoft PowerPoint, version 1.8. November 2015a.
- Schrödinger, LLC. The JyMOL molecular graphics development component, version 1.8. November 2015b.
- Schrödinger, LLC. The PyMOL molecular graphics system, version 1.8. November 2015c.
- Scikit-accuracy. 3.3. metrics and scoring: quantifying the quality of predictions — scikit-learn 1.2.2 documentation. [https://scikit-learn.org/stable/modules/model\\_evaluation.html#accuracy-score](https://scikit-learn.org/stable/modules/model_evaluation.html#accuracy-score), 2023. (Accessed on 06/07/2023).
- Scikit-learn Logistic. sklearn.linear\_model.logisticregression — scikit-learn 1.2.2 documentation. [https://scikit-learn.org/stable/modules/generated/sklearn.linear\\_model.LogisticRegression.html](https://scikit-learn.org/stable/modules/generated/sklearn.linear_model.LogisticRegression.html), 2023. (Accessed on 06/07/2023).
- Sklearn F1. sklearn.metrics.f1\_score — scikit-learn 0.24.2 documentation. [https://scikit-learn.org/0.24/modules/generated/sklearn.metrics.f1\\_score.html?highlight=f1%20score#sklearn.metrics.f1\\_score](https://scikit-learn.org/0.24/modules/generated/sklearn.metrics.f1_score.html?highlight=f1%20score#sklearn.metrics.f1_score), 2023. (Accessed on 06/10/2023).
- Sklearn KFold. sklearn.model\_selection.kfold — scikit-learn 0.23.2 documentation. [https://scikit-learn.org/0.23/modules/generated/sklearn.model\\_selection.KFold.html?highlight=kfold#sklearn.model\\_selection.KFold](https://scikit-learn.org/0.23/modules/generated/sklearn.model_selection.KFold.html?highlight=kfold#sklearn.model_selection.KFold), 2023. (Accessed on 07/30/2023).
- J. Sun and D. Frishman. Deephelicon: Accurate prediction of inter-helical residue contacts in transmembrane proteins by residual neural networks. *Journal of Structural Biology*, 212(1):107574, 2020.
- Uniprot - 4g7vS. Phosphatidylinositol-3,4,5-trisphosphate 3-phosphatase - ciona intestinalis (transparent sea squirt) — uniprotkb — uniprot. [https://www.uniprot.org/uniprotkb/F6XHE4/entry#names\\_and\\_taxonomy](https://www.uniprot.org/uniprotkb/F6XHE4/entry#names_and_taxonomy), 2023. (Accessed on 06/10/2023).
- T. UniProt Consortium. Uniprot: the universal protein knowledgebase in 2023. *Nucleic Acids Research*, 51(D1):D523–D531, 2023.
- M. Varadi, S. Anyango, M. Deshpande, S. Nair, C. Natassia, G. Yordanova, D. Yuan, O. Stroe, G. Wood, A. Laydon, et al. AlphaFold protein structure database: massively expanding the structural coverage of protein-sequence space with high-accuracy models. *Nucleic acids research*, 50(D1):D439–D444, 2022.
- Wikipedia F-score. F-score - wikipedia. <https://en.wikipedia.org/wiki/F-score>, 2023. (Accessed on 06/10/2023).
- Wikipedia Logistic. Logistic regression - wikipedia. [https://en.wikipedia.org/wiki/Logistic\\_regression#References](https://en.wikipedia.org/wiki/Logistic_regression#References), 2023. (Accessed on 06/07/2023).
- Wikipedia Precision. Precision and recall - wikipedia. [https://en.wikipedia.org/wiki/Precision\\_and\\_recall](https://en.wikipedia.org/wiki/Precision_and_recall), 2023. (Accessed on 06/10/2023).
